# Supplementary material for: Thermotogota diversity and distribution patterns revealed in Auka and JaichMaa ‘ja ‘ag hydrothermal vent fields in the Pescadero Basin, Gulf of California
Source: PeerJ journal article supplement (doi:10.7717/peerj.17724), 2024-08-19

# Auka

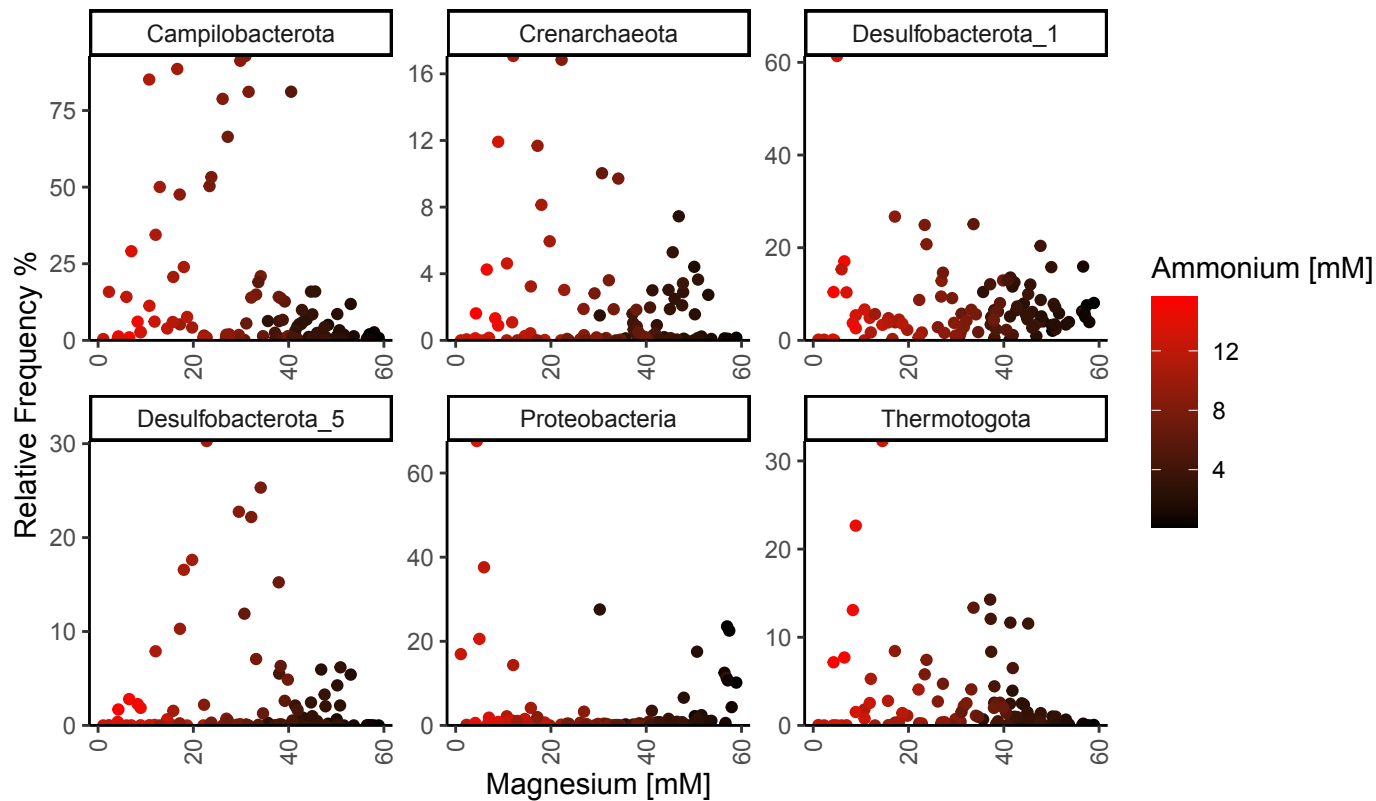

# JaichMaa Ja'ag'

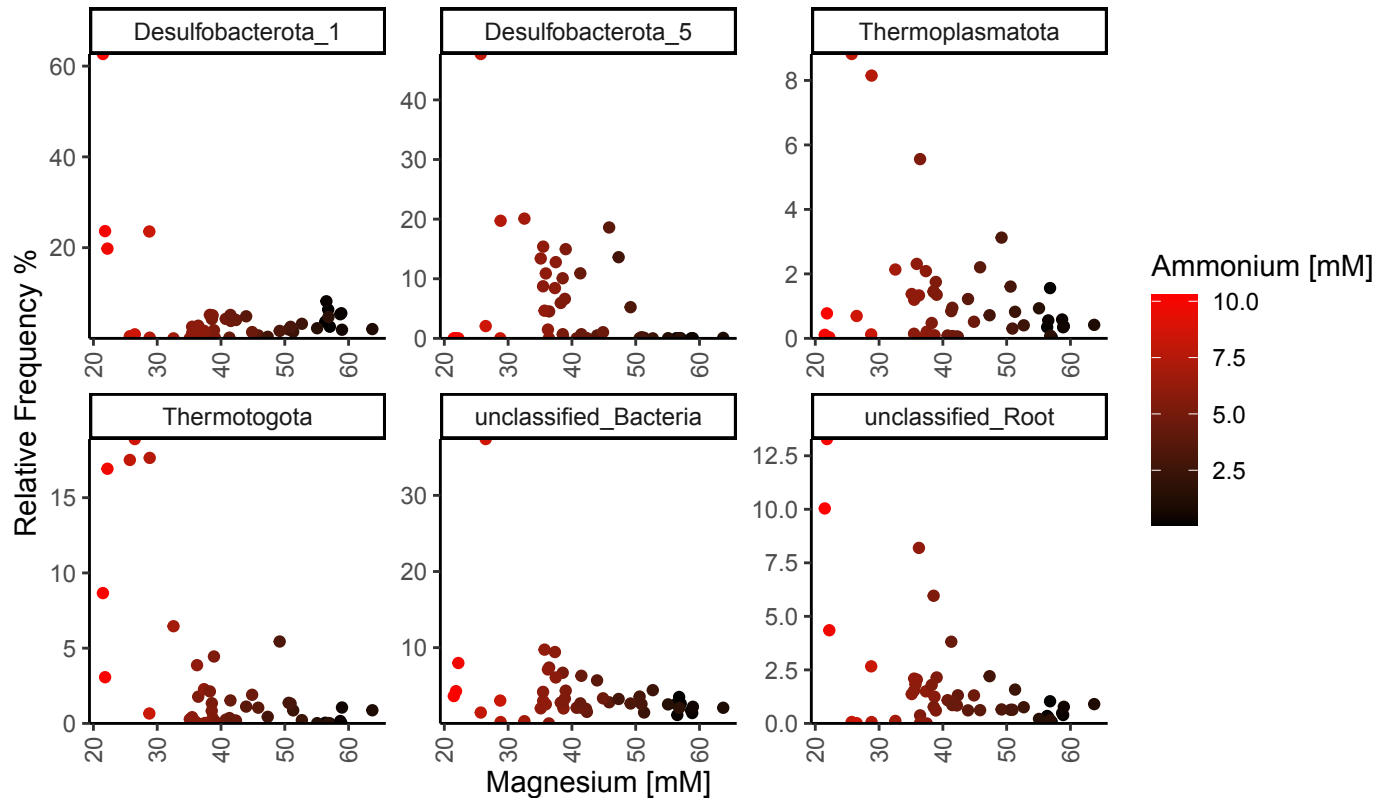

# Juwak Yuum

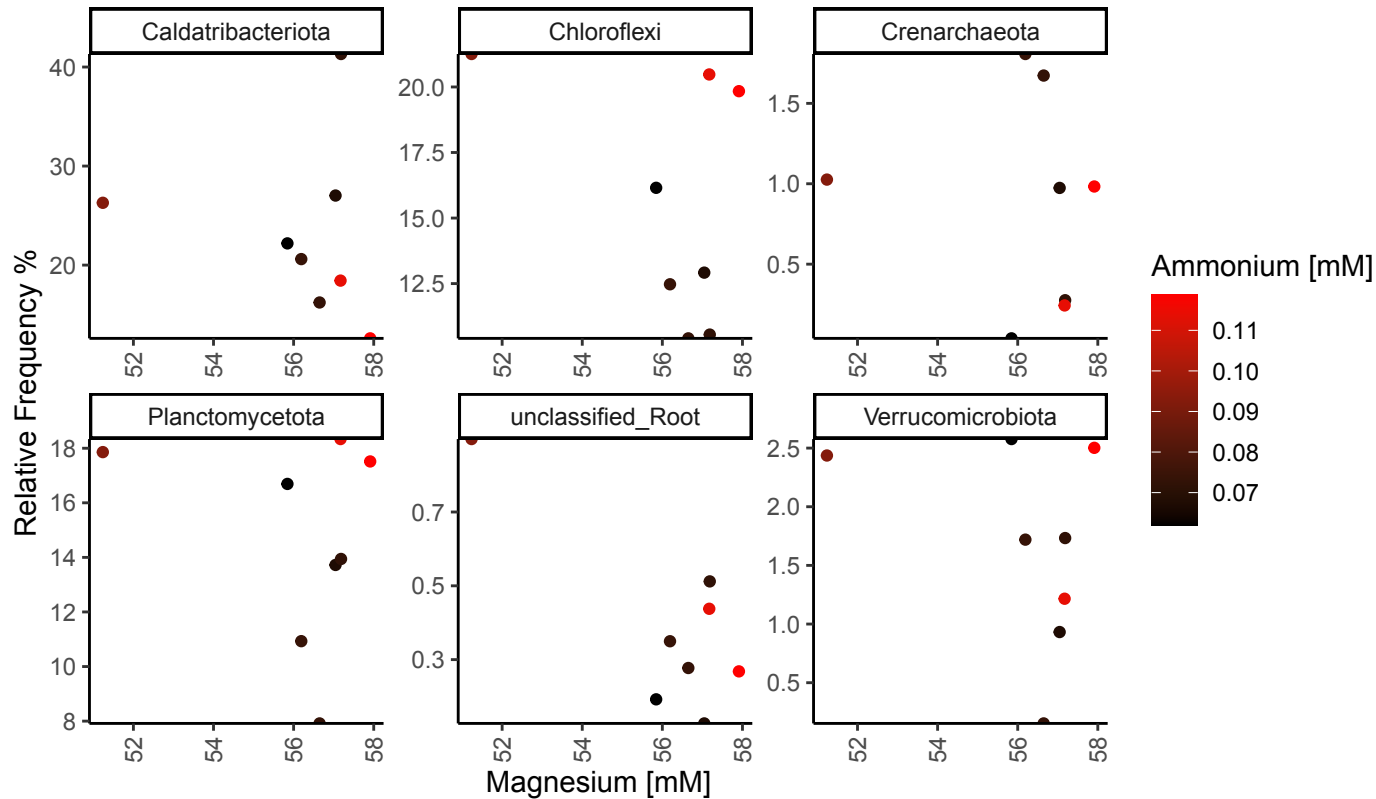

# Auka

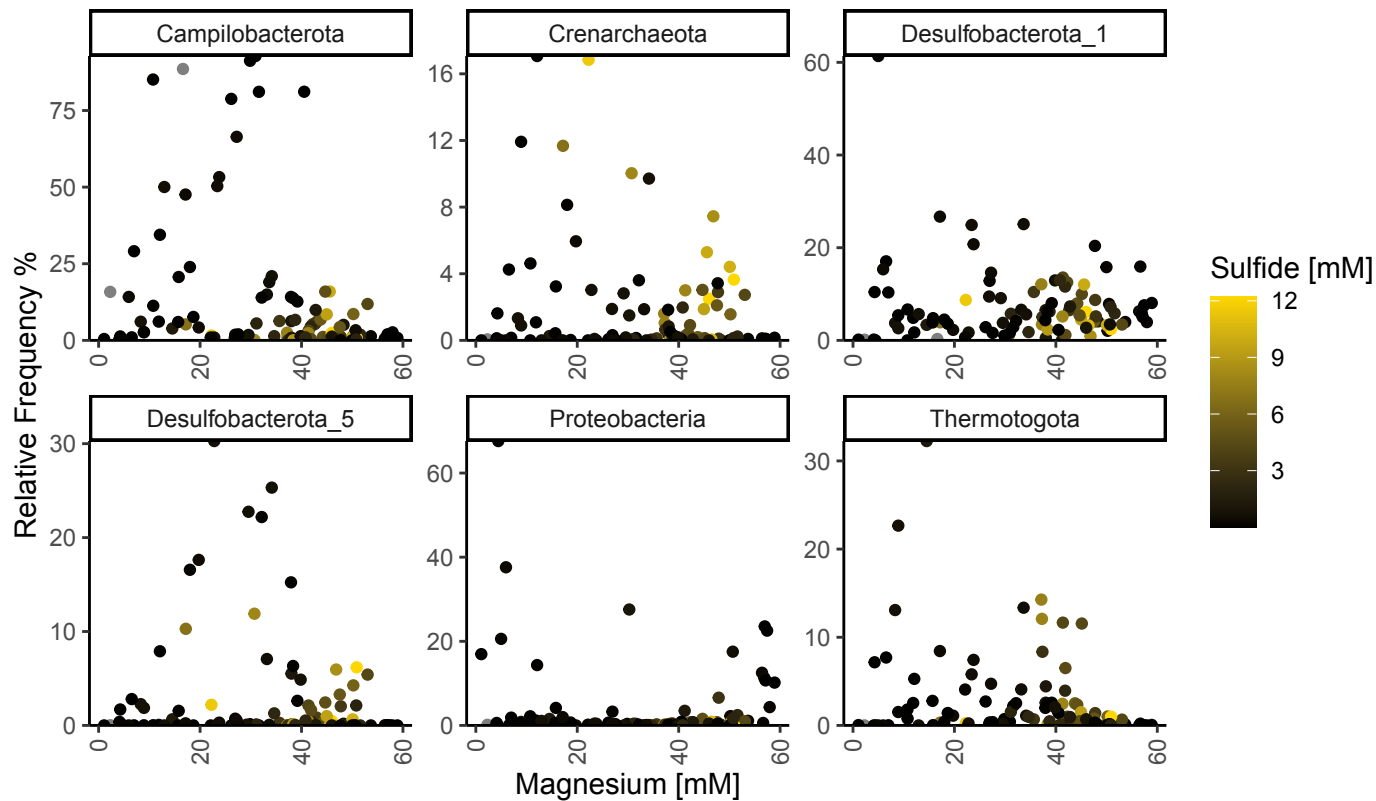

# JaichMaa Ja'ag'

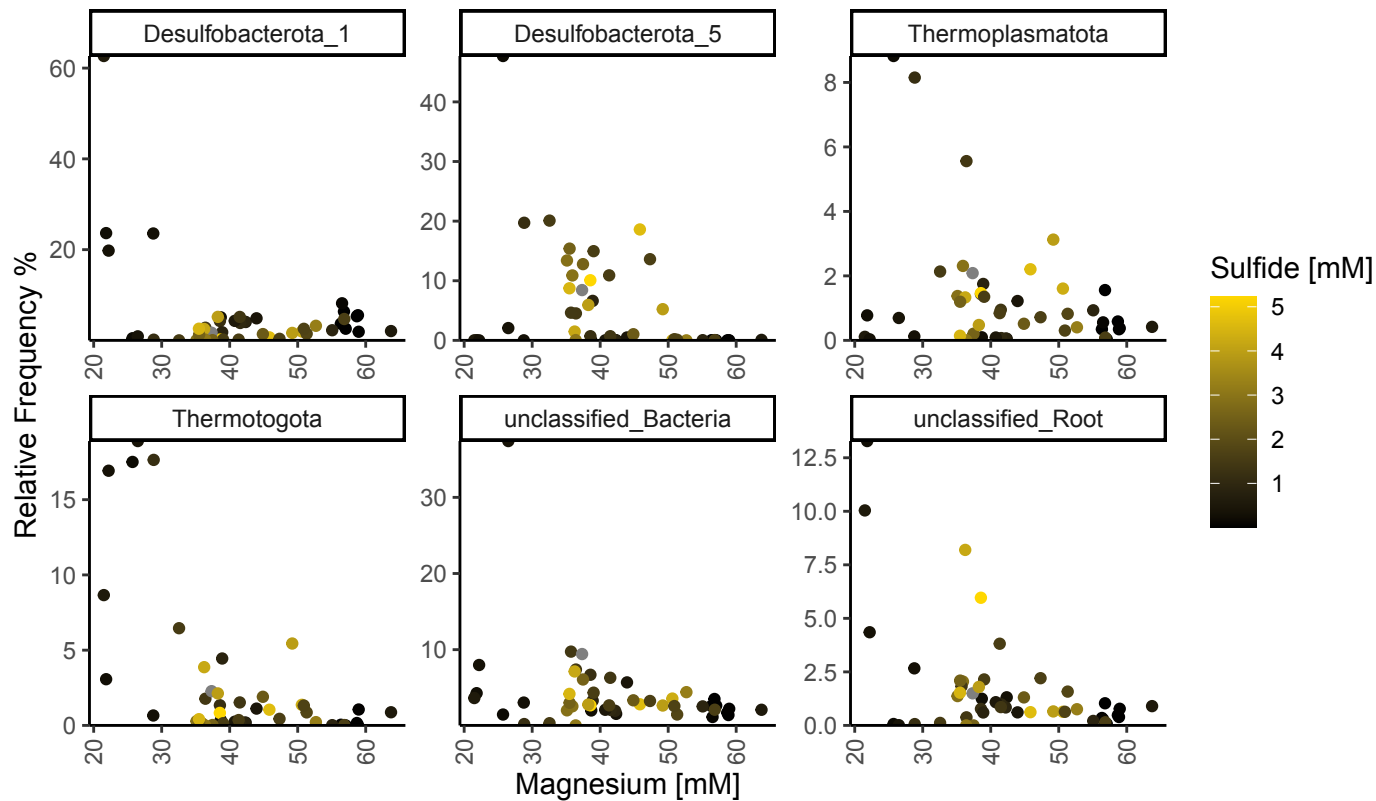

# Juwak Yuum

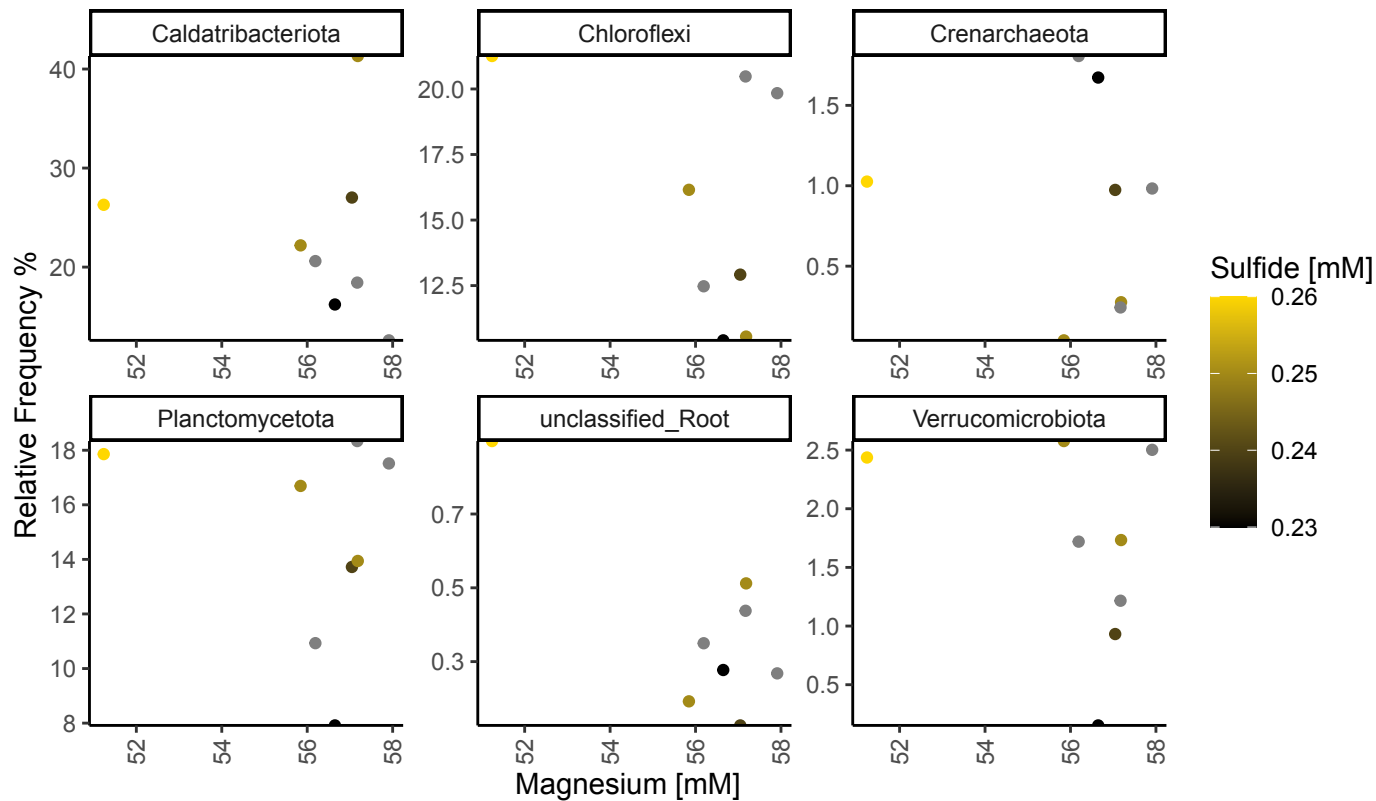

Supplement: FS2_Correlations.pdf [file FS2_Correlations.pdf]
