# Supplementary material for: Thermotogota diversity and distribution patterns revealed in Auka and JaichMaa ‘ja ‘ag hydrothermal vent fields in the Pescadero Basin, Gulf of California
Source: PeerJ journal article supplement (doi:10.7717/peerj.17724), 2024-08-19

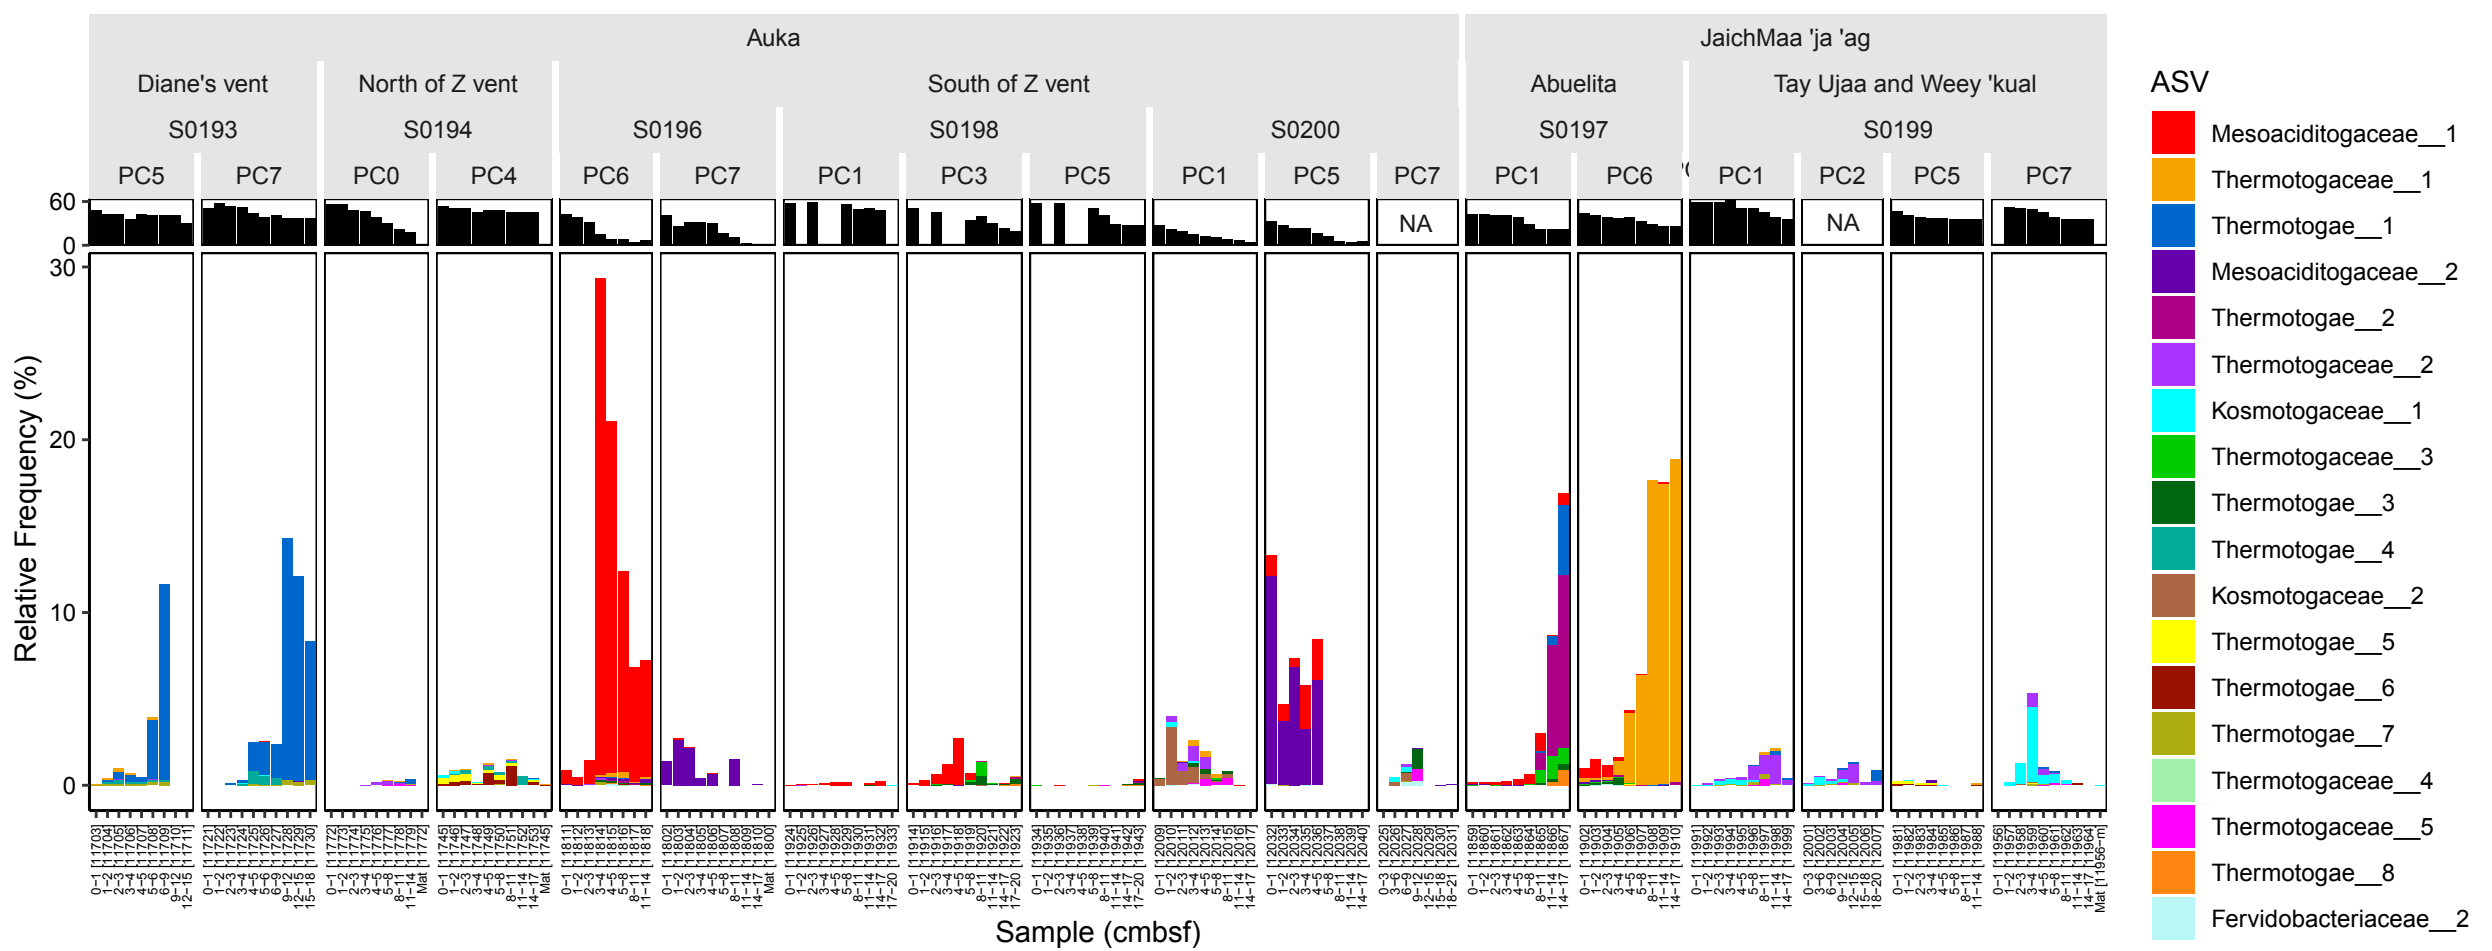

Supplement: FS3_Thermotogota_ASV.pdf [file FS3_Thermotogota_ASV.pdf]
